# Supplementary material
Source: PubMed Central journal article supplement (PMC2790812)
Supplement: NIHMS83414-supplement-Supporting_Inf.pdf [file NIHMS83414-supplement-Supporting_Inf.pdf]

## Electronic Supplementary Information

### Controlling the direction of site-selectivity and regioselectivity in RNA ligation by Zn<sup>2+</sup>-dependent deoxyribozymes that use 2',3'-cyclic phosphate RNA substrates

Diana M. Kost, Joseph P. Gerdt, P. I. Pradeepkumar and Scott K. Silverman\*

*Department of Chemistry, University of Illinois at Urbana-Champaign, 600 South Mathews Avenue, Urbana, IL 61801 (USA)*

#### Deoxyribozyme sequences

Unique sequences of all deoxyribozyme enzyme regions are listed below. Some of the enzyme regions are 39 or 41 nt rather than 40 nt due to a nucleotide deletion or addition during the selection process. For two pairs of the 8CW deoxyribozymes, the sequences could not be determined confidently due to overlap within one sequencing run between the two members of the pair, presumably due to overlapping *E. coli* colonies harboring plasmids with the two different deoxyribozyme sequences. Nonetheless, in each such case, the RNA linkage assignment is clear because partial alkaline hydrolysis assay of the mixture of products clearly revealed that no unnatural linkage was present, and the 8–17 and complement/100 mM Mg<sup>2+</sup>/pH 9.0 assays were similarly unequivocal. For each 7CX and 8CW deoxyribozyme, the binding arm to the 5'-side of the enzyme region is 5'-CGAAGTCGCCATCTCTTC..., and the binding arm to the 3'-side of the enzyme region is ...ATAGTGAGTCGTATTA-3'. For each 12BB deoxyribozyme, the binding arm to the 5'-side of the enzyme region is 5'-CGAAGTCGCCATCTC..., and the binding arm to the 3'-side of the enzyme region is ...GTGAGTCGTATTA-3'. Ligation yields are shown for deoxyribozymes prepared by solid-phase synthesis using either the parent (Par) or transversion (Tv) RNA substrate sequences outside of the unchanged UA↓GG nucleotides near the ligation site. Yields were determined only for deoxyribozymes that form 3'–5' linkages. n.d., yield not determined using a deoxyribozyme prepared by solid-phase synthesis.

#### 7CX deoxyribozymes

| <u>Name</u> | <u>Enzyme region sequence, 5' to 3'</u>   | <u>Linkage</u> | <u>Yield (Par)</u> | <u>Yield (Tv)</u> |
|-------------|-------------------------------------------|----------------|--------------------|-------------------|
| 7CX2        | GTGAGAGCCATTGTGCATTGTGGTGCAACTGTACGCGCCT  | 3'–5'          | 55%                | 46%               |
| 7CX3        | GTGAGAGCAGGTTTGGCACGCGTGCCACTAACCCGCGCCT  | 3'–5'          | n.d.               | 50%               |
| 7CX4        | GTGGGAGCCTGATGGAAGAATGGGAGAACAGCACGCGCCT  | 3'–5'          | 56%                | 11%               |
| 7CX5        | GGGAGAGCTAGGAGGCGCTGAGTCTCGGCTCCTCGCGCCT  | 3'–5'          | n.d.               | 35%               |
| 7CX6        | GTGAGAGCAAGCGAGGGATACATGAACCGAAACCGCGCCT  | 3'–5'          | 44%                | 43%               |
| 7CX7        | GTGAGAGCAGTAAACGGAAGGCCCTCTTCCTGTCCGCGCCT | 3'–5'          | n.d.               | 50%               |
| 7CX8        | GTGAGAGCATGTGGCACCCCTGGCAGGAACCTAACGCGCCT | 3'–5'          | 56%                | 19%               |
| 7CX9        | ACTGAGAGCCTCGATGAATGCCTAATTATATCGTCGCGCC  | 3'–5'          | 57%                | 32%               |
| 7CX10       | GTGAGAGCAATACGTATGAAGATATTGAAGTTTCGCGCCT  | 3'–5'          | 55%                | 57%               |
| 7CX12       | GTGAGAGCATCACTGTAACCGCCGTGCGGTGGACGCGCCT  | 3'–5'          | 53%                | 10%               |
| 7CX13       | GGGAGAGCAGTTATGATGCATGAGCCATTGACCGCGCCT   | 3'–5'          | n.d.               | 34%               |
| 7CX14       | GGGAGAGCAGCGATGCAAGACATTGGGGCGGAGCCGCGCT  | 3'–5'          | n.d.               | 15%               |
| 7CX21       | TGAGAGCATTTCCGGCGGAGCTCTACGGGGCCGCGCCT    | 3'–5'          | n.d.               | <1%               |
| 7CX11       | TTTAGTCAGGAGTAGACATCGATGATTGCTAATCGAACCT  | 2'–5'          | n.d.               | n.d.              |

**8CW deoxyribozymes**

| <u>Name</u> | <u>Enzyme region sequence, 5' to 3'</u>    | <u>Linkage</u> | <u>Yield (Par)</u> | <u>Yield (Tv)</u> |
|-------------|--------------------------------------------|----------------|--------------------|-------------------|
| 8CW1        | GTGAGAGAACC GCGGTGTAGACACAGATCGCGGCGCGCCT  | 3'-5'          | n.d.               | 45%               |
| 8CW8        | TACAAGGTGGGAGGAGGGAGCACCCGATGCGGCATATCGTG  | 3'-5'          | n.d.               | 50%               |
| 8CW11       | GGGAGAGCAGTTATGACGCATAAGCTATTGACCGCGCCT    | 3'-5'          | n.d.               | 15%               |
| 8CW15       | GTGAGAGCAATCACTTTGGGTAGGTACGGGTGAACGCGCT   | 3'-5'          | n.d.               | 52%               |
| 8CW16       | GTTAGAGCCAAACACGTTTGTGTGTCAGCGGGTTTCGCGCCT | 3'-5'          | n.d.               | 40%               |
| 8CW20       | GGAAGAGCAATGTACTCCGACGTCAGAGGATATCGCGCCT   | 3'-5'          | n.d.               | 39%               |
| 8CW17       | -                                          | 3'-5'          | n.d.               | n.d.              |
| 8CW22       | -                                          | 3'-5'          | n.d.               | n.d.              |
| 8CW3        | ACGCCACCATTAAAGAGCATCGCCGGAATAGCGGGGACT    | 2'-5'          |                    |                   |
| 8CW4        | GCACGGCCGATTGGGGGGCCCAATGACTTGATCATTGCT    | 2'-5'          |                    |                   |
| 8CW9        | ACACGCGTTACGGACTGAGCAGATTCAGGCCAAACTGCCT   | 2'-5'          |                    |                   |
| 8CW12       | ACATGTGCGGTAATGAGGCGTAGACAAATAGAGATACCT    | 2'-5'          |                    |                   |
| 8CW13       | GGGGAAGACAAGATAGTCGAGGGGGACGCGCTCTCAGCCT   | 2'-5'          |                    |                   |
| 8CW14       | GCGGGGTTAAGCCACGAATGCGGGGCAAAGCGTACCCCT    | 2'-5'          |                    |                   |
| 8CW19       | -                                          | 2'-5'          |                    |                   |
| 8CW21       | -                                          | 2'-5'          |                    |                   |

**12BB deoxyribozymes** (sequences of 12BB1, 2, 5, 6, 8, and 12 are from ref. 9)

| <u>Name</u> | <u>Enzyme region sequence, 5' to 3'</u>   | <u>Linkage</u> | <u>Yield (Par)</u> | <u>Yield (Tv)</u> |
|-------------|-------------------------------------------|----------------|--------------------|-------------------|
| 12BB5       | CAGCGCGATTGAGTGCGTGATTGAAGCTCGGGGTTGGTTA  | 3'-5'          | n.d.               | n.d.              |
| 12BB12      | CAGAGCCCCCTTACGTACAGCCTTTTTAGGTAACCGGGGAG | 3'-5'          | n.d.               | n.d.              |
| 12BB24      | CAGCGCGATTGGGGGCGTGATTGAAGCTCGGGGTTGGTTA  | 3'-5'          | n.d.               | n.d.              |
| 12BB26      | ACTATACCACCGAGATTCGAATTGGAGCAGTAGTGGCTTG  | 3'-5'          | n.d.               | n.d.              |
| 12BB33      | TGTAGCCTTCTGAAGGTTGGCTGGTTCGGCGAGGTGGGAA  | 3'-5'          | n.d.               | n.d.              |
| 12BB36      | ACCGGTCCCTGTCGGTCAAGGAGTGGCACTGAGGAGAAT   | 3'-5'          | n.d.               | n.d.              |
| 12BB41      | ACGCGAGGGGAGTTCAATCGCTTGTTCGGCAAGGTCGGGA  | 3'-5'          | n.d.               | n.d.              |
| 12BB1       | CCGCTCCGATTGGTGGAGTCTATTGGGGCTGTAGGCGAG   | 2'-5'          |                    |                   |
| 12BB2       | ACCGCGGGAGCTACGTTAGTGGTAACTGCTTGTAGGCGAG  | 2'-5'          |                    |                   |
| 12BB21      | AAGGCAGCAGGCGGCATTTTTTGTCCGTACGTTCTCCTATA | 2'-5'          |                    |                   |
| 12BB22      | ACCGCGGGAGTTTCGTTAGTGGTACTGCTTGTAGGCGAG   | 2'-5'          |                    |                   |
| 12BB25      | GTAGAGTGGTCCGGTTATCGCCTTAGATAACCATTGCTGT  | 2'-5'          |                    |                   |
| 12BB27      | CCGCTCCGATTGGTGAAGTCTATTGGGGCTGTAGGCGAG   | 2'-5'          |                    |                   |
| 12BB38      | CCGCTGCGGAGGTTGTACGCGTCTGTGGCTTGTAGGCGAG  | 2'-5'          |                    |                   |
| 12BB6       | TACACCTATTATGGTTTTCGTGAGGGGTGTGGCTGGTGCTG | unnat          |                    |                   |
| 12BB8       | CACGCTGACTAGCTTCGTGAGGGGGTGTGATAGATGCGG   | unnat          |                    |                   |
| 12BB23      | TACACCTATAATGGTTTTCGTGAGGGGTGTGGCTGATGCTG | unnat          |                    |                   |
| 12BB30      | CCTGTACTGCGTGTCTCAAATCAGCCGGGTGTGTGAACTC  | unnat          |                    |                   |
| 12BB32      | TGTATGTGGGGGTGTGTATCAGTCTACTGTGGCTTAAGC   | unnat          |                    |                   |
